# Supplementary material
Source: Springer Nature journal article supplement (https://www.springermedizin.de/resource/supplementary/13561_2012_37_MOESM4_ESM.pdf/9687280)

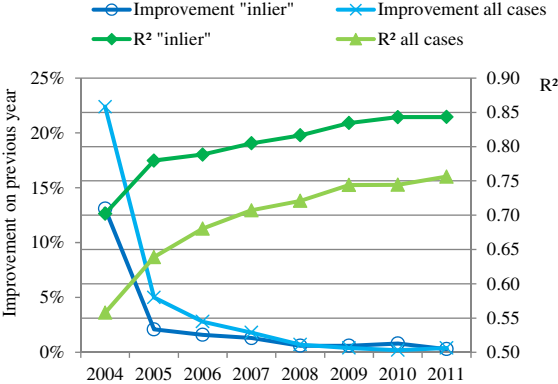

Supplement: MOESM4 [file 9687280]
